Title: VASOPRESSOR CLEARANCE AND PHARMACODYNAMICS DURING NITROPRUSSIDE INFUSION - COMPARISON OF LEFT ATRIAL AND SYSTEMIC VENOUS ADMINISTRATION

Authors: R. S. Jaffe, M.D. and N. D. Kien, Ph.D.

Affiliation: Department of Anesthesiology, University of California, School of Medicine, Davis, California 95616

**Introduction.** The vasodilators presently available for the treatment of pulmonary hypertension also significantly dilate the systemic circulation, causing unwanted systemic hypotension when high dosages are required. Sympathomimetic agents may be used to ameliorate systemic hypotension. However, their usefulness is limited by the occurrence of pulmonary vasoconstriction resulting from  $\alpha$ -receptor stimulation (1). Left-atrial administration of systemic vasoconstrictors has been used to minimize concomitant pulmonary vasoconstriction (2). This should be most effective when systemic clearance of the vasoconstrictors is high. This study was designed to measure vasoconstrictor clearance during simultaneous vasodilator administration; simulating the clinical situation.

**Methods.** After approval by the institutional Animal Use and Care Administrative Advisory Committee, 6 dogs were given isoflurane anesthesia and had the following lines implanted: flow-directed pulmonary artery thermodilution catheter, left carotid arterial catheter, and left atrial catheter. Then after a one-hour stabilization period, administration of left atrially (LA) administered vasoconstrictors (in random order) ensued: epinephrine ( $0.1 \mu\text{g}\cdot\text{kg}^{-1}\cdot\text{min}^{-1}$ ), norepinephrine ( $0.05 \mu\text{g}\cdot\text{kg}^{-1}\cdot\text{min}^{-1}$ ), dopamine ( $8.5 \mu\text{g}\cdot\text{kg}^{-1}\cdot\text{min}^{-1}$ ) and phenylephrine ( $1 \mu\text{g}\cdot\text{kg}^{-1}\cdot\text{min}^{-1}$ ) each for 15 minutes, with concomitant intravenous (IV) administration of nitroprusside to minimize hemodynamic changes. Then drug administration was shifted to a systemic vein in the same order with the same dose of nitroprusside. Hemodynamic measurements and blood samples for vasopressor levels were obtained after a control period and at the end of each infusion period. Arterial blood gases, body temperature, and end-tidal isoflurane concentrations were closely controlled. Catecholamine concentrations were measured by radioenzymatic assay. Two-tailed paired t-testing was used for statistical comparisons.

**Results.** (table) Comparing IV and LA administration of the catecholamines, systemic vascular resistance (SVR), pulmonary vascular resistance (PVR), cardiac output (CO), and mean systemic arterial pressure (MAP), did not change significantly. Hemodynamics also did not significantly differ when comparing IV to LA administration of phenylephrine (percent change [mean  $\pm$  SD]: SVR  $18 \pm 32$ , PVR  $15 \pm 50$ , CO  $0 \pm 36$ , MAP  $9 \pm 18$ ). Peripheral clearance was high, resulting in lower pulmonary arterial concentration of the catecholamines when the agents were delivered through the LA. The lower pulmonary clearance resulted in similar systemic arterial concentrations, whether the drug was given through the LA or IV.

**Discussion.** Low pulmonary clearance of the catecholamines means that systemic hemodynamics will be similar whether the drug is administered LA or IV. Higher peripheral clearance should result in less of an increase in PVR when the vasoconstrictor is administered LA, and dopamine may have predominately vasodilatory effects if it reaches the pulmonary artery in quantities sufficient only to stimulate dopaminergic receptors (3). Studies in animals with elevated PVR will be required to see if this is, indeed, true. Another study showed approximately 50% higher peripheral clearance, but with up to 11-fold faster average infusion rates (4). Peripheral clearance may be concentration-dependant.

**References.**

- Hyman AL, Lipton HL, Kadowitz PJ: Nature of  $\alpha_1$  and postjunctional  $\alpha_2$  adrenoceptors in the pulmonary vascular bed. Fed Proc 45:2336-2340, 1986
- Curling PE, Zaidan JR, Murphy DA, Knopf WD, Reich KE: Treatment of pulmonary hypertension after human orthotopic heart transplantation (Abstr). Anesth Analg 66:S37, 1987
- Hoshino Y, Obara H, Iwai S: Relaxant effect of dopamine on isolated rabbit pulmonary artery. Life Sci 39:2525-2531, 1986
- Pearl RG, Maze M, Rosenthal MH: Pulmonary and systemic hemodynamic effects of central venous and left atrial sympathomimetic drug administration in the dog. J Cardiothoracic Anesth 1:29-35, 1987

|                                                         | NOREPINEPHRINE               | EPINEPHRINE                  | DOPAMINE                     |
|---------------------------------------------------------|------------------------------|------------------------------|------------------------------|
| <b>Clearance (percent) Mean <math>\pm</math> SD</b>     |                              |                              |                              |
| Peripheral                                              | 46.8 $\pm$ 9.0 <sup>^</sup>  | 43.8 $\pm$ 12.1 <sup>^</sup> | 48.1 $\pm$ 13.3 <sup>^</sup> |
| Pulmonary                                               | 21.8 $\pm$ 7.3               | 7.1 $\pm$ 7.2                | 13.2 $\pm$ 8.2               |
| <b>Clearance (ml/min)</b>                               |                              |                              |                              |
| Peripheral                                              | 1691 $\pm$ 545*              | 2141 $\pm$ 964 <sup>^</sup>  | 2239 $\pm$ 484 <sup>^</sup>  |
| Pulmonary                                               | 993 $\pm$ 625                | 462 $\pm$ 583                | 799 $\pm$ 801                |
| <b>Intrinsic Clearance (ml/min)</b>                     |                              |                              |                              |
| Peripheral                                              | 3304 $\pm$ 1227 <sup>^</sup> | 4003 $\pm$ 1990 <sup>^</sup> | 4587 $\pm$ 1538 <sup>^</sup> |
| Pulmonary                                               | 1315 $\pm$ 839               | 539 $\pm$ 708                | 986 $\pm$ 1034               |
| <b>Hemodynamic Change - IV vs LA Administration (%)</b> |                              |                              |                              |
| SVR                                                     | -3 $\pm$ 33                  | 9 $\pm$ 27                   | 7 $\pm$ 20                   |
| PVR                                                     | 7 $\pm$ 46                   | 1 $\pm$ 56                   | 36 $\pm$ 98                  |
| CO                                                      | 19 $\pm$ 28                  | 5 $\pm$ 31                   | 3 $\pm$ 21                   |
| MAP                                                     | 8 $\pm$ 13                   | 6 $\pm$ 11                   | 8 $\pm$ 10                   |
| <b>Pulmonary Artery Concentration (pg/ml)</b>           |                              |                              |                              |
| LA delivery                                             | 479 $\pm$ 149*               | 644 $\pm$ 419*               | 30916 $\pm$ 8024*            |
| IV delivery                                             | 905 $\pm$ 249                | 1083 $\pm$ 630               | 63343 $\pm$ 13144            |
| Control                                                 | 72 $\pm$ 33                  | 110 $\pm$ 47                 | 130 $\pm$ 47                 |
| <b>Systemic Artery Concentration (pg/ml)</b>            |                              |                              |                              |
| LA delivery                                             | 909 $\pm$ 303                | 1113 $\pm$ 523               | 60228 $\pm$ 13500*           |
| IV delivery                                             | 705 $\pm$ 141                | 992 $\pm$ 539                | 55027 $\pm$ 12984            |
| Control                                                 | 69 $\pm$ 52                  | 109 $\pm$ 65                 | 163 $\pm$ 158                |

\* = p < .05      ^ = p < .01  
comparing peripheral vs. pulmonary clearance  
or LA vs. IV delivery
